# Supplementary material for: Transformation and degradation of recalcitrant organic matter in membrane bioreactor leachate effluent by the O3/H2O2process
Source: Royal Society of Chemistry journal article supplement (doi:10.1039/c9ew00552h), 2019-01-01
Supplement: c9ew00552h1.pdf [file c9ew00552h1.pdf]

**Transformation and degradation of recalcitrant organic matters in membrane  
bioreactor leachate effluent by O<sub>3</sub>/H<sub>2</sub>O<sub>2</sub> process**

Zhepei Gu, Weiming Chen, Fan Wang, Qibin Li\*

Faculty of Geosciences and Environmental Engineering, Southwest Jiaotong University, Chengdu

611756, China

Corresponding author: Qibin Li ([liqb@home.swjtu.edu.cn](mailto:liqb@home.swjtu.edu.cn))

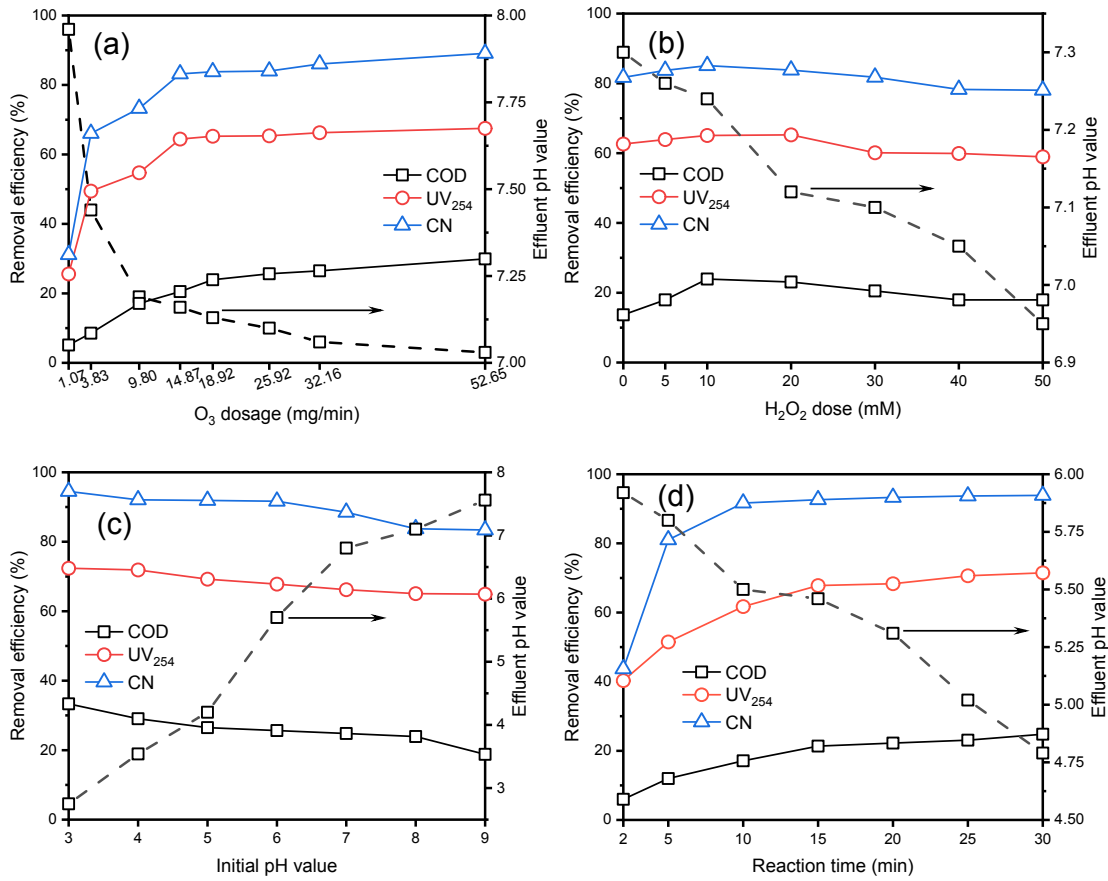

Fig. S1. Effect of reaction conditions on regular indices removal by O<sub>3</sub>/H<sub>2</sub>O<sub>2</sub>. Conditions: O<sub>3</sub> dosage = 18.92 mg/min, H<sub>2</sub>O<sub>2</sub> dose = 10 mM, initial pH = 3, and reaction time = 30 min.

Table S1. Specific absorbance ratio of MBR leachate during O<sub>3</sub>/H<sub>2</sub>O<sub>2</sub> treatment

| Item                               | 0 min    | 2 min   | 5 min   | 10 min  | 15 min  | 30 min  |
|------------------------------------|----------|---------|---------|---------|---------|---------|
| E <sub>254</sub>                   | 1.2533   | 0.7915  | 0.7725  | 0.5578  | 0.4080  | 0.3782  |
| E <sub>280</sub>                   | 1.0236   | 0.6348  | 0.6178  | 0.4036  | 0.2784  | 0.2590  |
| E <sub>240</sub> /E <sub>420</sub> | 10.3799  | 10.6404 | 12.1524 | 26.7399 | 31.4444 | 24.3478 |
| E <sub>250</sub> /E <sub>365</sub> | 3.3695   | 3.4819  | 3.6164  | 5.7753  | 7.1205  | 6.1242  |
| E <sub>300</sub> /E <sub>400</sub> | 4.2793   | 4.3147  | 4.6146  | 7.1217  | 7.9588  | 5.6942  |
| A <sub>226-400</sub>               | 128.6055 | 80.5962 | 77.7126 | 50.6467 | 36.1731 | 34.6965 |
| A <sub>275-295</sub>               | 0.0114   | 0.0112  | 0.0115  | 0.0153  | 0.0175  | 0.0159  |
| A <sub>350-400</sub>               | 0.0157   | 0.0154  | 0.0168  | 0.0198  | 0.0203  | 0.0158  |
